# Supplementary material
Source: publisher figshare collection journal article supplement (https://karger.figshare.com/ndownloader/files/7356208)
Supplement: Supplementary file 1 [file 7356208]

Supplementary table. The baseline demographics of the study population

| Number (%) | | Total | Male | Female | *P* value* |
| --- | --- | --- | --- | --- | --- |
| 532 (100) | 113 (21.2) | 419 (78.8) |
| Age (mean±SD) | | 47.8±11.4 | 47.6±10.7 | 47.9±11.6 | 0.839 |
| Job | Housewife | 272 (51.1) | 1 (0.9) | 271 (64.7) | <0.001 |
| Employee | 151 (28.4) | 58 (51.3) | 93 (22.2) |  |
| Self-employed | 67 (12.6) | 36 (31.9) | 31 (7.4) |  |
| Student | 14 (2.6) | 2 (1.8) | 12 (2.9) |  |
| Others | 28 (5.3) | 16 (14.2) | 12 (2.9) |  |
| Education level | Less than high school | 103 (19.4) | 12 (10.6) | 91 (21.7) | 0.000 |
| High school graduate | 173 (32.5) | 31 (27.4) | 142 (33.9) |  |
| College graduate | 220 (41.4) | 55 (48.7) | 165 (39.4) |  |
| Postgraduate degree | 27 (5.1) | 13 (11.5) | 14 (3.3) |  |
| More than postgraduate | 9 (1.7) | 2 (1.8) | 7 (1.7) |  |
| Age distribution | <20 years | 3 (0.6) | 0 (0) | 3 (0.7) | 0.434 |
| 20s | 33 (6.2) | 4 (3.5) | 29 (6.9) |  |
| 30s | 89 (16.7) | 25 (22.1) | 64 (15.3) |  |
| 40s | 163 (30.6) | 37 (32.7) | 126 (30.1) |  |
| 50s | 165 (31.0) | 33 (29.2) | 132 (31.5) |  |
| 60s | 61 (11.5) | 11 (9.7) | 50 (11.9) |  |
| >70s | 18 (3.4) | 3 (2.7) | 15 (3.6) |  |
| Number of radioiodine therapies/tests (Q3) | Once | 260 (48.9) | 50 (44.3) | 210 (50.1) | 0.474 |
| Twice | 192 (36.1) | 41 (36.3) | 151 (36.0) |  |
| Three times | 47 (8.8) | 13 (11.5) | 34 (8.1) |  |
| >Four times | 33 (6.2) | 9 (8.0) | 24 (5.7) |  |
| Duration of thyroid hormone withdrawal (Q4) | Less than 2 weeks | 269 (50.6) | 60 (53.1) | 209 (49.9) | 0.831 |
| 2-4 weeks | 213 (40.0) | 43 (38.1) | 170 (40.6) |  |
| Over 4 weeks | 50 (9.4) | 10 (8.9) | 40 (9.6) |  |

* All *P* values described in above table represent clinical significance of differences between male and female patients
